# Supplementary material for: Efficient azobenzene co-sensitizer for wide spectral absorption of dye-sensitized solar cells
Source: Royal Society of Chemistry journal article supplement (doi:10.1039/c7ra12229b), 2018-01-01
Supplement: c7ra12229b1.pdf [file c7ra12229b1.pdf]

**Table S1 Crystal data collections and structure refinements for ADD**

| compound 1                                          |                             |                         |                             |
|-----------------------------------------------------|-----------------------------|-------------------------|-----------------------------|
| Formula                                             | C16H16N4CuO4                | Crystal system          | Orthorhombic                |
| Fw                                                  | 391.87                      | V /nm <sup>3</sup>      | 1.621(2)                    |
| Space group                                         | P212121                     | Temperature (K)         | 296(2)                      |
| a/nm                                                | 0.533(4)                    | $\alpha$ /°             | 90.00                       |
| b/nm                                                | 1.228(10)                   | $\beta$ /°              | 90.00                       |
| c/nm                                                | 2.474(19)                   | $\gamma$ /°             | 90.00                       |
| Z                                                   | 4                           | Dc/Mg m <sup>-3</sup>   | 1.606                       |
| F(000)                                              | 804                         | $\mu$ /mm <sup>-1</sup> | 1.378                       |
| $\theta$ range (°)                                  | 1.65–28.46                  | Reflections collected   | 10123                       |
| Independent reflections (Rint)                      | 4016(0.0199)                | GOF                     | 1.035                       |
| Final R <sub>a,b</sub> indices [ $I > 2\sigma(I)$ ] | R1 = 0.0259<br>wR2 = 0.0639 | R indices (all data)    | R1 = 0.0321<br>wR2 = 0.0666 |

$$a \text{ R1} = \frac{\sum ||F_o| - |F_c||}{\sum |F|}, \text{ b wR2} = \frac{|\sum w(|F_o|^2 - |F_c|^2)|}{\sum w(F)^2} |1/2$$

**Table S2 Bond lengths (nm) and angles (°) of ADD**

| compound 1 |           |           |           |           |           |
|------------|-----------|-----------|-----------|-----------|-----------|
| Bond       | Dist.(nm) | Bond      | Dist.(nm) | Bond      | Dist.(nm) |
| Cu1-O2     | 0.193(13) | Cu1-N2    | 0.200(15) | Cu1-N1    | 0.198(14) |
| Cu1-O4     | 0.195(12) | N3-N4     | 0.123(3)  |           |           |
| Angle      | (°)       | Angle     | (°)       | Angle     | (°)       |
| O2-Cu1-O4  | 91.85(6)  | O2-Cu1-N2 | 171.41(7) | N1-Cu1-N2 | 84.19(7)  |
| O2-Cu1-N1  | 92.55(6)  | O4-Cu1-N2 | 91.39(6)  | O4-Cu1-N1 | 175.58(6) |

**Table S3 Hydrogen bond distances (nm) and angles (°) in ADD**

| D-H          | d(D-H) | d(H...A) | $\angle$ DHA | d(D-A)   | A     |
|--------------|--------|----------|--------------|----------|-------|
| N(1)-H(1B)   | 0.090  | 0.223    | 135          | 0.294(3) | O(1)B |
| N(2)-H(2A)   | 0.090  | 0.200    | 168          | 0.289(2) | O(3)B |
| C(15)-H(15A) | 0.097  | 0.253    | 139          | 0.332(2) | O(4)C |

symmetry code: B, 1+x, y, z; C, 1-x, 0.5+y, 0.5-z

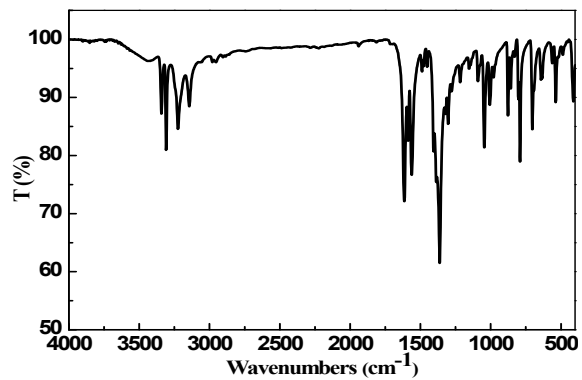

Fig.S1. IR curve of ADD

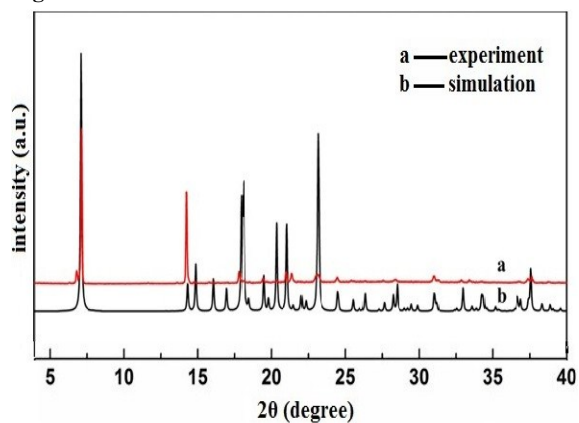

Fig.S2. The experimental (a) and simulative (b) powder X-ray diffraction patterns for ADD

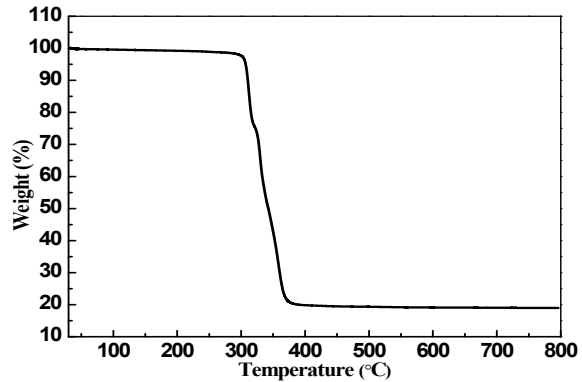

Fig.S3. TGA curve of ADD

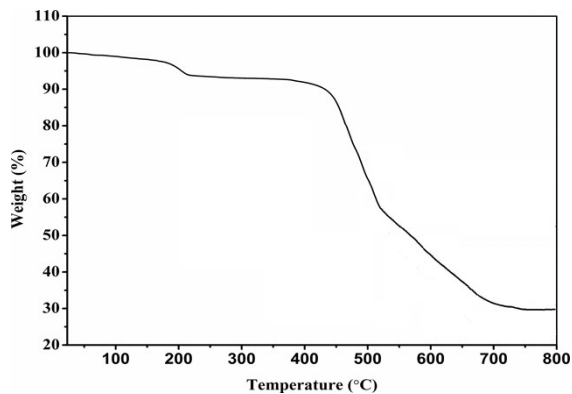

Fig.S4. TGA curve of DDB
